# Supplementary material for: A Systematic Review of the Association of Skipping Breakfast with Weight and Cardiometabolic Risk Factors in Children and Adolescents. What Should We Better Investigate in the Future?
Source: PubMed Central journal article supplement (PMC6412508; doi:10.3390/nu11020387), 2019-02-13
Supplement: nutrients-11-00387-s001.pdf [file nutrients-11-00387-s001.pdf]

**Supplementary Table 1.** Newcastle - Ottawa Quality Assessment Scale for studies on weight and skipping breakfast

| <b>Reference<br/>(Author,<br/>year, n)</b> | <b>Selection</b> | <b>Comparability</b> | <b>Outcome/<br/>Exposure</b> |
|--------------------------------------------|------------------|----------------------|------------------------------|
| Dialektakou<br>2008 [12]                   | ***              | **                   | *                            |
| Dubois<br>2008 [13]                        | ***              | *                    | **                           |
| Harding<br>2008 [14]                       | ****             | *                    | *                            |
| Duncan<br>2008 [15]                        | ***              | *                    | **                           |
| Croezen<br>2009 [16]                       | ***              | **                   | **                           |
| Nagel<br>2009 [17]                         | ***              | *                    | *                            |
| Sun<br>2009 [18]                           | ***              | **                   | *                            |
| Maddah<br>2010 [19]                        | ***              | *                    | *                            |
| Isacco<br>2010 [20]                        | ***              | *                    | *                            |
| Deshmukh-<br>Taskar<br>2010 [21]           | ***              | *                    | *                            |
| So<br>2011 [22]                            | ***              | *                    | **                           |
| Tin<br>2011 [23]                           | ***              | *                    | *                            |
| Mushtaq<br>2011 [24]                       | ****             | **                   | **                           |
| Kuriyan<br>2012 [25]                       | ***              | *                    | *                            |
| Kyriazis<br>2012 [26]                      | ***              | *                    | *                            |
| Van<br>Lippevelde<br>2013 [27]             | ***              | *                    | *                            |
| Januszek-<br>Trzciakowska<br>2014 [28]     | ***              | *                    | *                            |
| Kupers<br>2014 [29]                        | ***              | *                    | **                           |
| O'Neil<br>2015 [30]                        | ***              | *                    | **                           |
| Smetanina<br>2015 [31]                     | ***              | *                    | **                           |
| Zakrzewski<br>2015 [32]                    | ***              | *                    | **                           |
| Wijtzes<br>2016 [33]                       | ***              | *                    | **                           |
| Fayet-Moore<br>2016 [34]                   | ***              | *                    | *                            |
| Alsharairi<br>2016 [35]                    | ***              | *                    | *                            |
| Fayet-Moore<br>2017 [36]                   | ***              | *                    | *                            |
| Smith                                      | ***              | *                    | *                            |

|                        |      |   |    |
|------------------------|------|---|----|
| 2017 [37]              |      |   |    |
| Gotthelf<br>2017 [38]  | ***  | * | ** |
| Nilsen<br>2017 [39]    | ***  | * | ** |
| Keszyus<br>2017 [40]   | **** | * | ** |
| Zalewska<br>2017 [41]  | ***  | * | *  |
| Coulthard<br>2018 [42] | ***  | * | ** |
| Tee<br>2018 [43]       | ***  | * | ** |
| Arhero<br>2018 [44]    | ***  | * | *  |
| Smith<br>2010 [11]     | ***  | * | *  |
| Shafiee<br>2013 [45]   | ***  | * | ** |
| Ho<br>2015 [46]        | ***  | * | ** |
| Marlatt<br>2016 [47]   | ***  | * | ** |

**Supplementary Table 2.** Newcastle - Ottawa Quality Assessment Scale for studies on metabolic variables and skipping breakfast

| <b>Reference<br/>(Author,<br/>year, n)</b> | <b>Selection</b> | <b>Comparability</b> | <b>Outcome/<br/>Exposure</b> |
|--------------------------------------------|------------------|----------------------|------------------------------|
| Smith<br>2010 [11]                         | ***              | *                    | *                            |
| Monzani<br>2013 [48]                       | ***              | *                    | *                            |
| Shafiee<br>2013 [45]                       | ****             | *                    | **                           |
| Ho<br>2015 [46]                            | ****             | *                    | **                           |
| Osawa<br>2015 [49]                         | ***              | *                    | **                           |
| Marlatt<br>2016 [47]                       | ****             | *                    | **                           |
